# Supplementary material
Source: publisher figshare collection journal article supplement (https://acs.figshare.com/ndownloader/files/3614253)
Supplement: Supplementary file 1 [file 3614253]

PET Acquisition: 900 sec, 511 keV Photopeak Energy Level, 350 keV Lower level discrimination, 650 keV Upper level discrimination, 3.432 nsec timing window

PET Histogram: 3D Histogram, No smoothing, 1 iteration, 20% threshold, no gating, Data format: Intel/Vax 2-byte integer, span: 3, ring difference: 79, Deadtime correction: global, Delay handling: subtract, Projections: -1

PET Reconstruction: OSEM3D/MAP algorithm, 2 OSEM3D iterations, 18 MAP iterations, Resolution: 1.5 mm, new scatter file created for each image

CT Acquisition: Multi-bed acquisition, 97.28 transaxial x 130.4 axial FOV, CCD readout: 3968 transaxial x 3840 axial pixels, binning 4, exposure time 145 ms, settle time 200 ms, total rotation 220 degrees, rotation steps 120, 50 dark/light calibrations used

CT Reconstruction: Shepp-logan reconstruction filter, bilinear interpolation, downsample factor 2, Voxel size:  $x = 412.9 \text{ um}$ ,  $y = 412.9 \text{ um}$ ,  $z = 533.33 \text{ um}$ , no ring reduction
